# Supplementary material
Source: PubMed Central journal article supplement (PMC3551999)
Supplement: NIHMS407490-supplement-1_si_001.pdf [file NIHMS407490-supplement-1_si_001.pdf]

## Supporting Information for Blair, et. al.

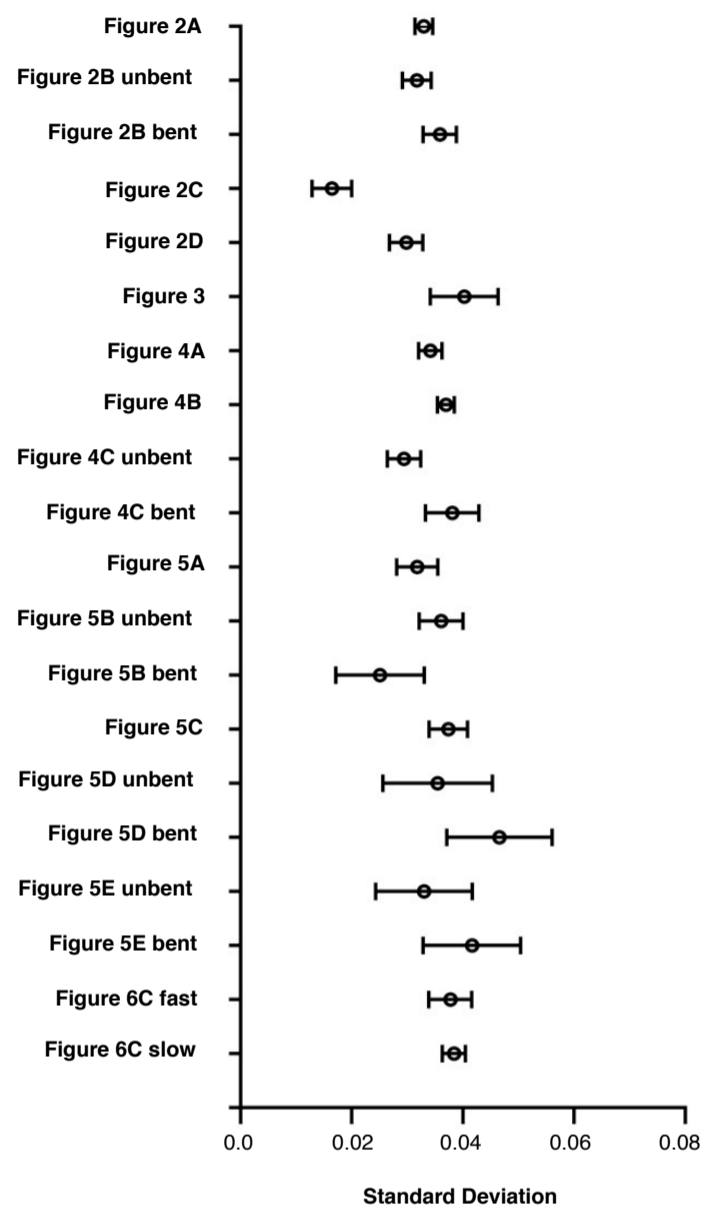

**Figure S1.** Plot of the standard deviations of the Gaussian fits as a measurement of their widths. The error bars represent the 95% confidence intervals. The free TATA-less DNA (Figure 2C) fits with a slightly narrower Gaussian; the widths of the remainder of the Gaussian fits are largely overlapping within their 95% confidence intervals.
